# Supplementary material for: CLK2 mediates IκBα-independent early termination of NF-κB activation by inducing cytoplasmic redistribution and degradation
Source: PubMed Central journal article supplement (PMC11082251; doi:10.1038/s41467-024-48288-z), 2024-05-09
Supplement: 41467_2024_48288_MOESM1_ESM.pdf [file 41467_2024_48288_MOESM1_ESM.pdf]

## Supplementary Information

### CLK2 mediates I $\kappa$ B $\alpha$ -independent early termination of NF- $\kappa$ B activation by inducing cytoplasmic redistribution and degradation

Shang-Ze Li<sup>#, 1, 3</sup>, Qi-Peng Shu<sup>#, 1</sup>, Hai-Meng Zhou<sup>1</sup>, Yu-Ying Liu<sup>1</sup>, Meng-Qi Fan<sup>1</sup>, Xin-Yi Liang<sup>1</sup>, Lin-Zhi Qi<sup>3</sup>, Ya-Nan He<sup>1</sup>, Xue-Yi Liu<sup>1</sup>, Xue-Hua Du<sup>1</sup>, Xi-Chen Huang<sup>1</sup>, Yu-zhen Chen<sup>2</sup>, Run-Lei Du<sup>\*, 1</sup>, Yue-xiu Liang<sup>\*, 2</sup> and Xiao-Dong Zhang<sup>\*, 1, 2, 4</sup>

<sup>1</sup>Hubei Key Laboratory of Cell Homeostasis, College of Life Sciences, Wuhan University, Wuhan, 430072, Hubei, China

<sup>2</sup>Key Laboratory of Research on Clinical Molecular Diagnosis for High Incidence Diseases in Western Guangxi of Guangxi Higher Education Institutions & Department of Gynecology, Affiliated Hospital of Youjiang Medical University for Nationalities

<sup>3</sup>School of Medicine, Chongqing University, Chongqing, 400044, China;

<sup>4</sup>National Health Commission Key Laboratory of Birth Defect Research and Prevention & MOE Key Lab of Rare Pediatric Diseases, Department of Cell Biology and Genetics, School of Basic Medical Sciences, School of Basic Medical Sciences, Hengyang Medical School, University of South China, Hengyang, China;

<sup>#</sup>These authors contributed equally to this work

\*Correspondence to: Run-Lei Du, Email: runleidu@whu.edu.cn; Yue-xiu Liang, 105706981@qq.com; Xiao-Dong Zhang, Email: zhangxd@whu.edu.cn

## Supplementary Figure 1

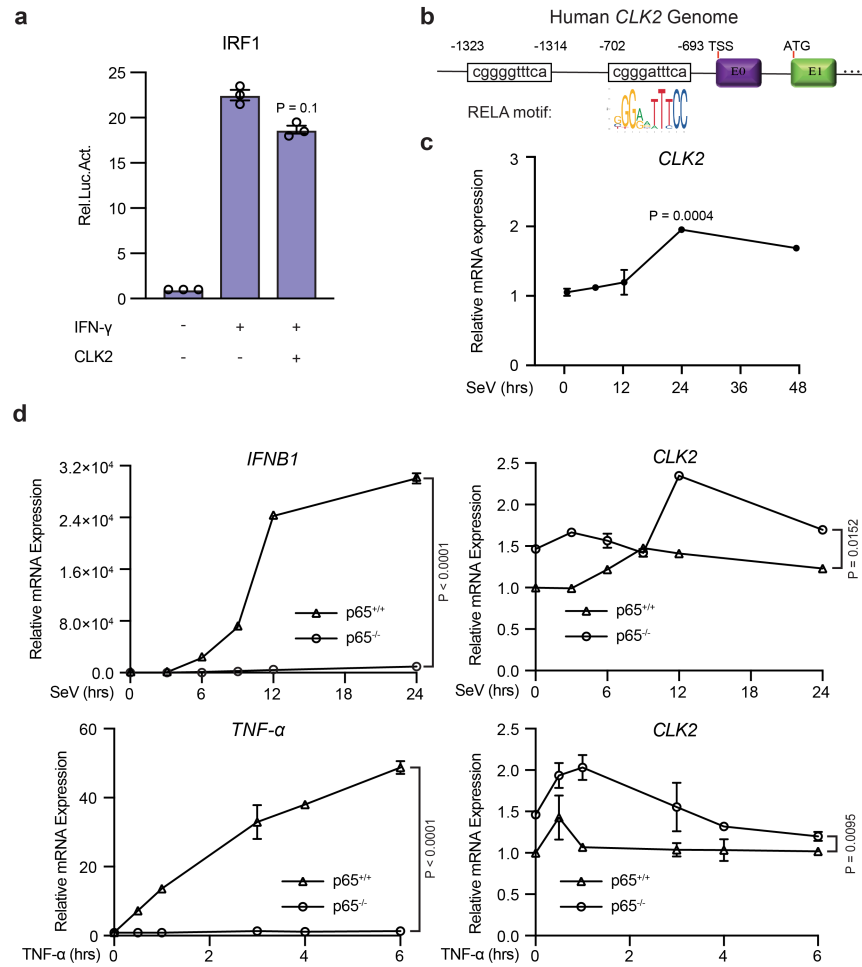

### Supplementary Figure 1. CLK2 negatively regulates the transcriptional activation of NF- $\kappa$ B.

(a) IRF1 promoter activity after exposure to IFN- $\gamma$  (100 ng/ml) for 12 hours in the presence or absence of CLK2 (800 ng) expression plasmids. (b) A schematic of the RELA motif in the human *CLK2* gene promoter. (c) The mRNA level of *CLK2* in HEK293T cells after SeV infection at the indicated time points was determined by real-time PCR analysis (n=3). (d) The mRNA levels of *IFNB1*, *TNF- $\alpha$*  and *CLK2* in p65<sup>+/+</sup> and p65<sup>-/-</sup> HEK293T cells after SeV or TNF- $\alpha$  infection at the indicated time points were determined by real-time PCR analysis (n=3). The data are representative of three independent experiments. The data are presented as the means  $\pm$  SEMs (n=3 for a, c and d). Statistical significance was analyzed by two-tailed Student's *t* test (a and c) and two-tailed ANOVA (d) ( $p > 0.05$ , not significant, \* $p < 0.05$ , \*\* $p < 0.01$ , \*\*\* $p < 0.001$ , \*\*\*\* $p < 0.0001$ ). Source data (a-d) are provided as a Source Data file.

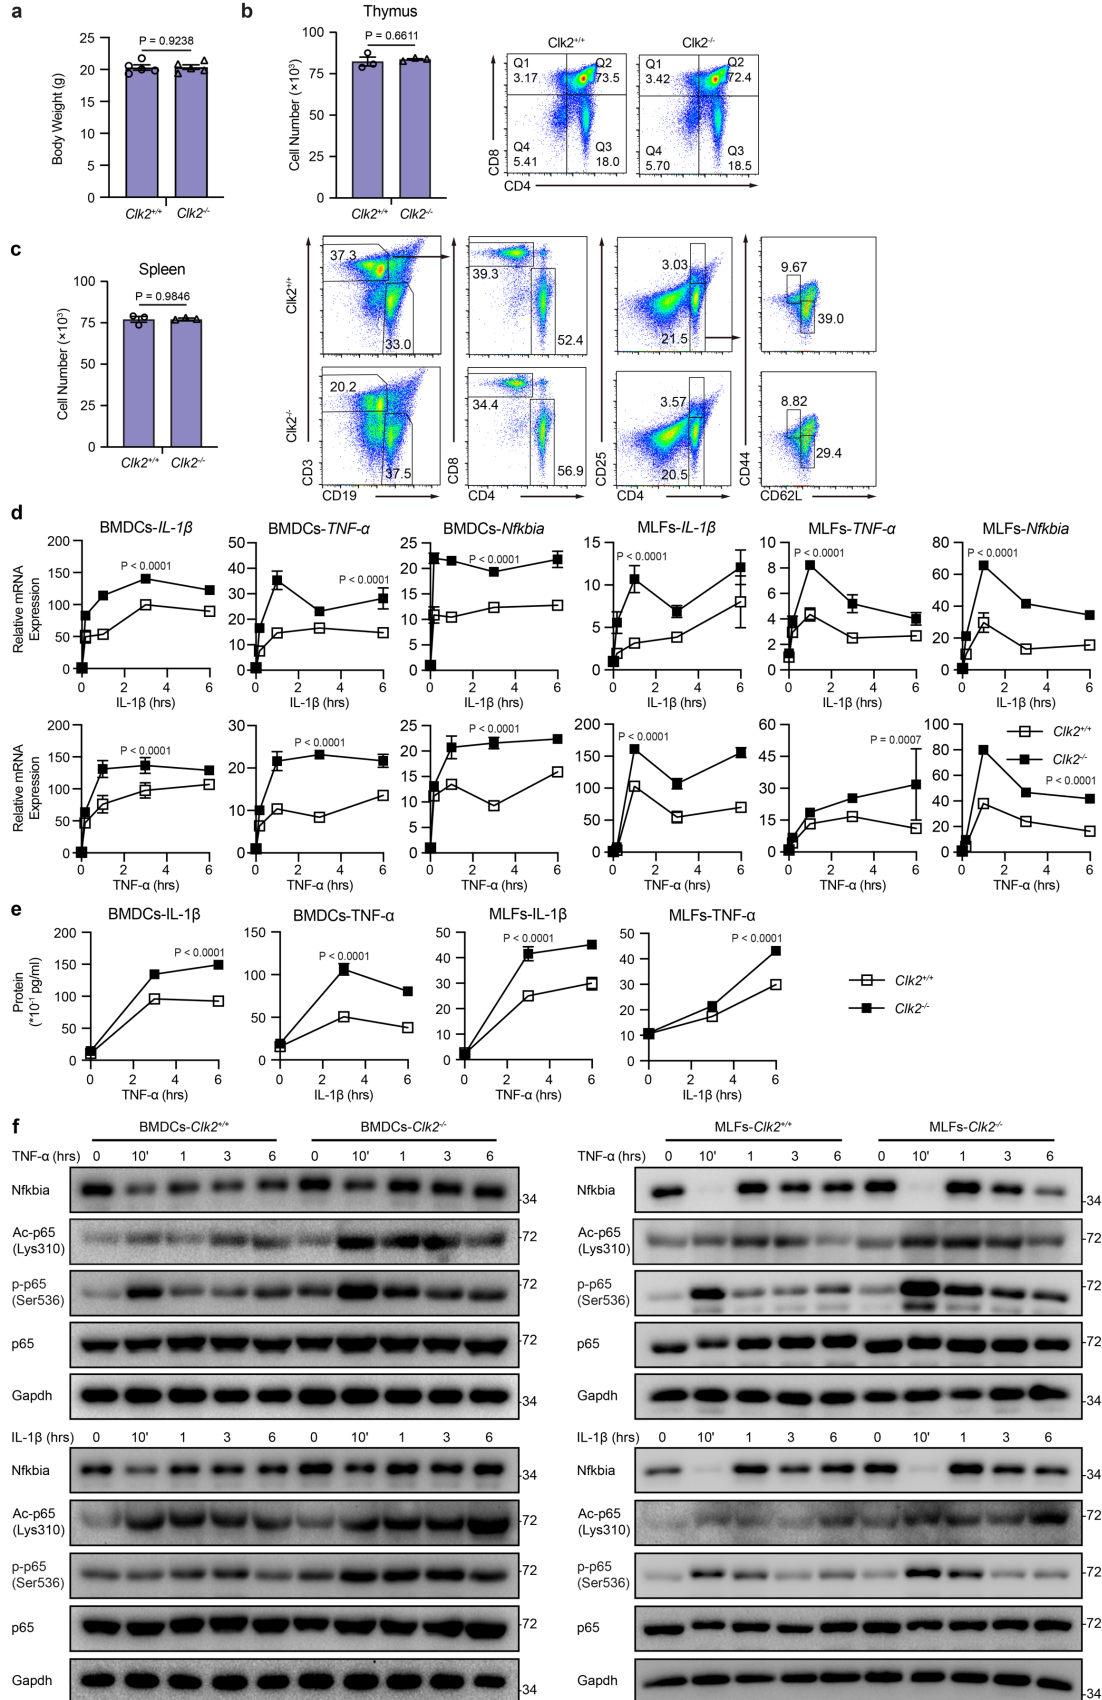

**Supplementary Figure 2. *Clk2* deficiency enhances the NF- $\kappa$ B-mediated inflammatory response.**

(a) Body weights of *Clk2*<sup>+/+</sup> and *Clk2*<sup>-/-</sup> male mice at 7 weeks of age (n=5). (b and c) Flow cytometric analysis and quantitation of immune cells in the thymus (b) and spleen (c) of *Clk2*<sup>+/+</sup> and *Clk2*<sup>-/-</sup> male mice (n=3). (d) Real-time PCR analysis of *IL-1 $\beta$* , *TNF- $\alpha$*  and *Nfkbia* mRNA levels in *Clk2*<sup>+/+</sup> and *Clk2*<sup>-/-</sup> BMDCs and MLFs stimulated with *TNF- $\alpha$*  (50 ng/ml) and *IL-1 $\beta$*  (50 ng/ml) for the indicated times (n=3). (e) ELISA analysis of *IL-1 $\beta$*  and *TNF- $\alpha$*  protein levels in *Clk2*<sup>+/+</sup> and *Clk2*<sup>-/-</sup> BMDCs and MLFs stimulated with *TNF- $\alpha$*  and *IL-1 $\beta$*  for the indicated times (n=3). (f) Western blot analysis of *Nfkbia*, Ac-p65<sup>K310</sup>, p-p65<sup>S536</sup>, p65 and *Gapdh* in *Clk2*<sup>+/+</sup> and *Clk2*<sup>-/-</sup> BMDCs and MLFs stimulated with *TNF- $\alpha$*  and *IL-1 $\beta$*  for the indicated times. The data are representative of three independent experiments. The data are presented as the means  $\pm$  SEMs. Statistical significance was analyzed by two-tailed Student's *t* test (a-c) or two-tailed ANOVA (d, e) ( $p > 0.05$ , not significant,  $*p < 0.05$ ,  $**p < 0.01$ ,  $***p < 0.001$ ,  $****p < 0.0001$ ). Source data (a-f) are provided as a Source Data file.

Supplementary Figure 3

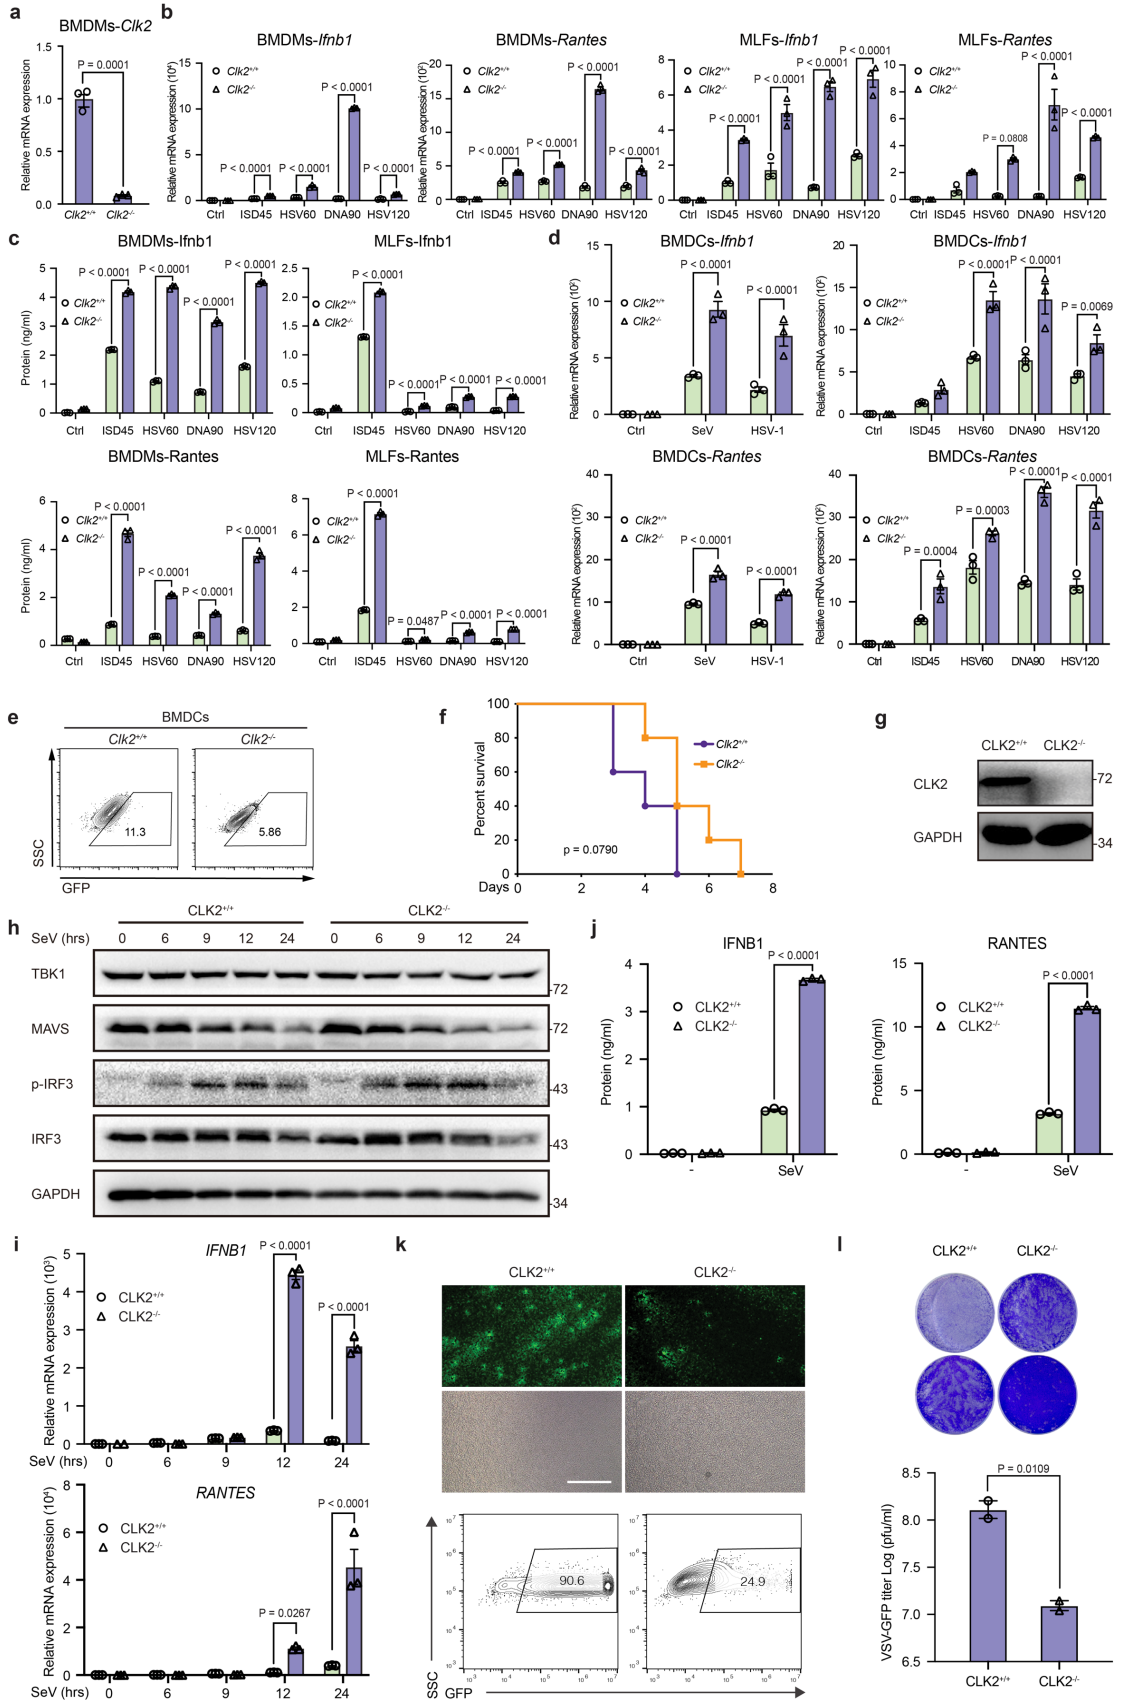

**Supplementary Figure 3. CLK2 deficiency enhances virus-induced IFN- $\beta$  production and the antiviral response.**

(a) Examination of *Clk2*-deficient BMDMs at the mRNA level (n=3). (b) Real-time PCR analysis of *Ifnb1* and *Rantes* mRNA levels in *Clk2*<sup>+/+</sup> and *Clk2*<sup>-/-</sup> BMDMs and MLFs transfected with ISD45, HSV60, DNA90, and HSV120 for 6 hours (n=3). (c) ELISA analysis of *Ifnb1* and *Rantes* protein levels in *Clk2*<sup>+/+</sup> and *Clk2*<sup>-/-</sup> BMDMs and MLFs transfected with ISD45, HSV60, DNA90 and HSV120 for 6 hours (n=3). (d) Real-time PCR analysis of *Ifnb1* and *Rantes* mRNA levels in *Clk2*<sup>+/+</sup> and *Clk2*<sup>-/-</sup> BMDCs infected with SeV for 12 hours, infected with HSV-1 for 6 hours or transfected with ISD45, HSV60, DNA90 and HSV120 for 6 hours (n=3). (e) *Clk2*<sup>+/+</sup> and *Clk2*<sup>-/-</sup> BMDCs were infected with VSV-GFP at an MOI of 2 for 12 hours before flow cytometric analysis. (f) Survival analysis (Kaplan–Meier curves) of *Clk2*<sup>+/+</sup> and *Clk2*<sup>-/-</sup> mice at 6 weeks after infection with HSV-1 ( $2.4 \times 10^6$  pfu) via the tail vein and intraperitoneal injection. The survival of the mice was monitored for 8 days (n=5). (g) Western blot analysis of CLK2 protein levels in HEK293T cells to verify CLK2 deletion. (h) Western blot analysis of phosphorylated IRF3 and total TBK1, MAVS, IRF3 and GAPDH in CLK2<sup>+/+</sup> and CLK2<sup>-/-</sup> HEK293T cells infected with SeV at the indicated times. (i) Real-time PCR analysis of *IFNB1* and *RANTES* mRNA levels in CLK2<sup>+/+</sup> and CLK2<sup>-/-</sup> HEK293T cells infected with SeV for the indicated times (n=3). (j) ELISA analysis of IFNB1 and RANTES protein levels in the supernatants of CLK2<sup>+/+</sup> and CLK2<sup>-/-</sup> HEK293T cells infected with SeV for 24 hours (n=3). (k) The effects of CLK2 deficiency on VSV-GFP infection for 12 hours before phase contrast and fluorescence microscopy and flow cytometric analysis of CLK2<sup>+/+</sup> and CLK2<sup>-/-</sup> HEK293T cells. The scale bar is 500  $\mu$ m. (l) CLK2<sup>+/+</sup> and CLK2<sup>-/-</sup> HEK293T cells were infected with VSV-GFP for 1 h, followed by culture for 24 hours with fresh medium. Then, the supernatants were subjected to plaque assays using Vero cells (n=2). The data are representative of three independent experiments. The data are presented as the means  $\pm$  SEMs. Statistical significance was analyzed by two-tailed Student's *t* test (a, l) or two-tailed ANOVA (b-d, i-j) ( $p > 0.05$ , not significant,  $*p < 0.05$ ,  $**p < 0.01$ ,  $***p < 0.001$ ,  $****p < 0.0001$ ). Source data (a-l) are provided as a Source Data file.

## Supplementary Figure 4

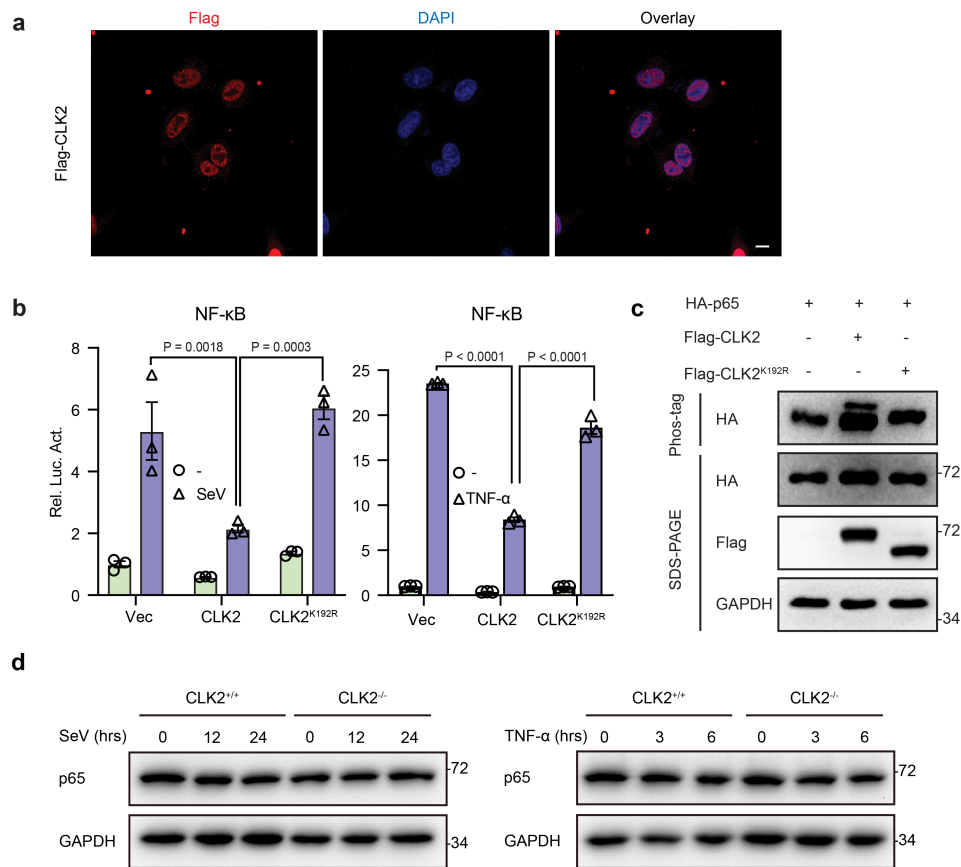

### Supplementary Figure 4. CLK2 interacts with and phosphorylates p65 to reverse its nuclear localization.

(a) Immunofluorescence analysis of the localization of exogenous Flag-CLK2 in HEK293T cells. Images were obtained by fluorescence microscopy. The scale bar is 10  $\mu$ m. (b) Luciferase reporter experiments analyzing NF- $\kappa$ B activity in HEK293T cells transfected with plasmids encoding CLK2 and CLK2<sup>K192R</sup> for 24 hours followed by stimulation with SeV or TNF- $\alpha$  for 12 hours ( $n=3$ ). (c) Phos-tag SDS-PAGE analysis of the phosphorylation of p65 in the presence of CLK2 or CLK2<sup>K192R</sup> in HEK293T cells transfected with HA-p65 plus Flag-CLK2 or Flag-CLK2<sup>K192R</sup> before Phos-tag and SDS-PAGE were performed with anti-HA and anti-Flag antibodies. The upper shifted band represents the phosphorylated p65 protein. (d) Western blot analysis of p65 protein levels in CLK2<sup>+/+</sup> and CLK2<sup>-/-</sup> HEK293T cells infected with SeV or TNF- $\alpha$  at the indicated time points. The data are representative of three independent experiments. The data are presented as the means  $\pm$  SEMs. Statistical significance was analyzed by two-tailed ANOVA (b) ( $p > 0.05$ , not significant,  $*p < 0.05$ ,  $**p < 0.01$ ,  $***p < 0.001$ ,  $****p < 0.0001$ ). Source data (b-d) are provided as a Source Data file.

Supplementary Figure 5

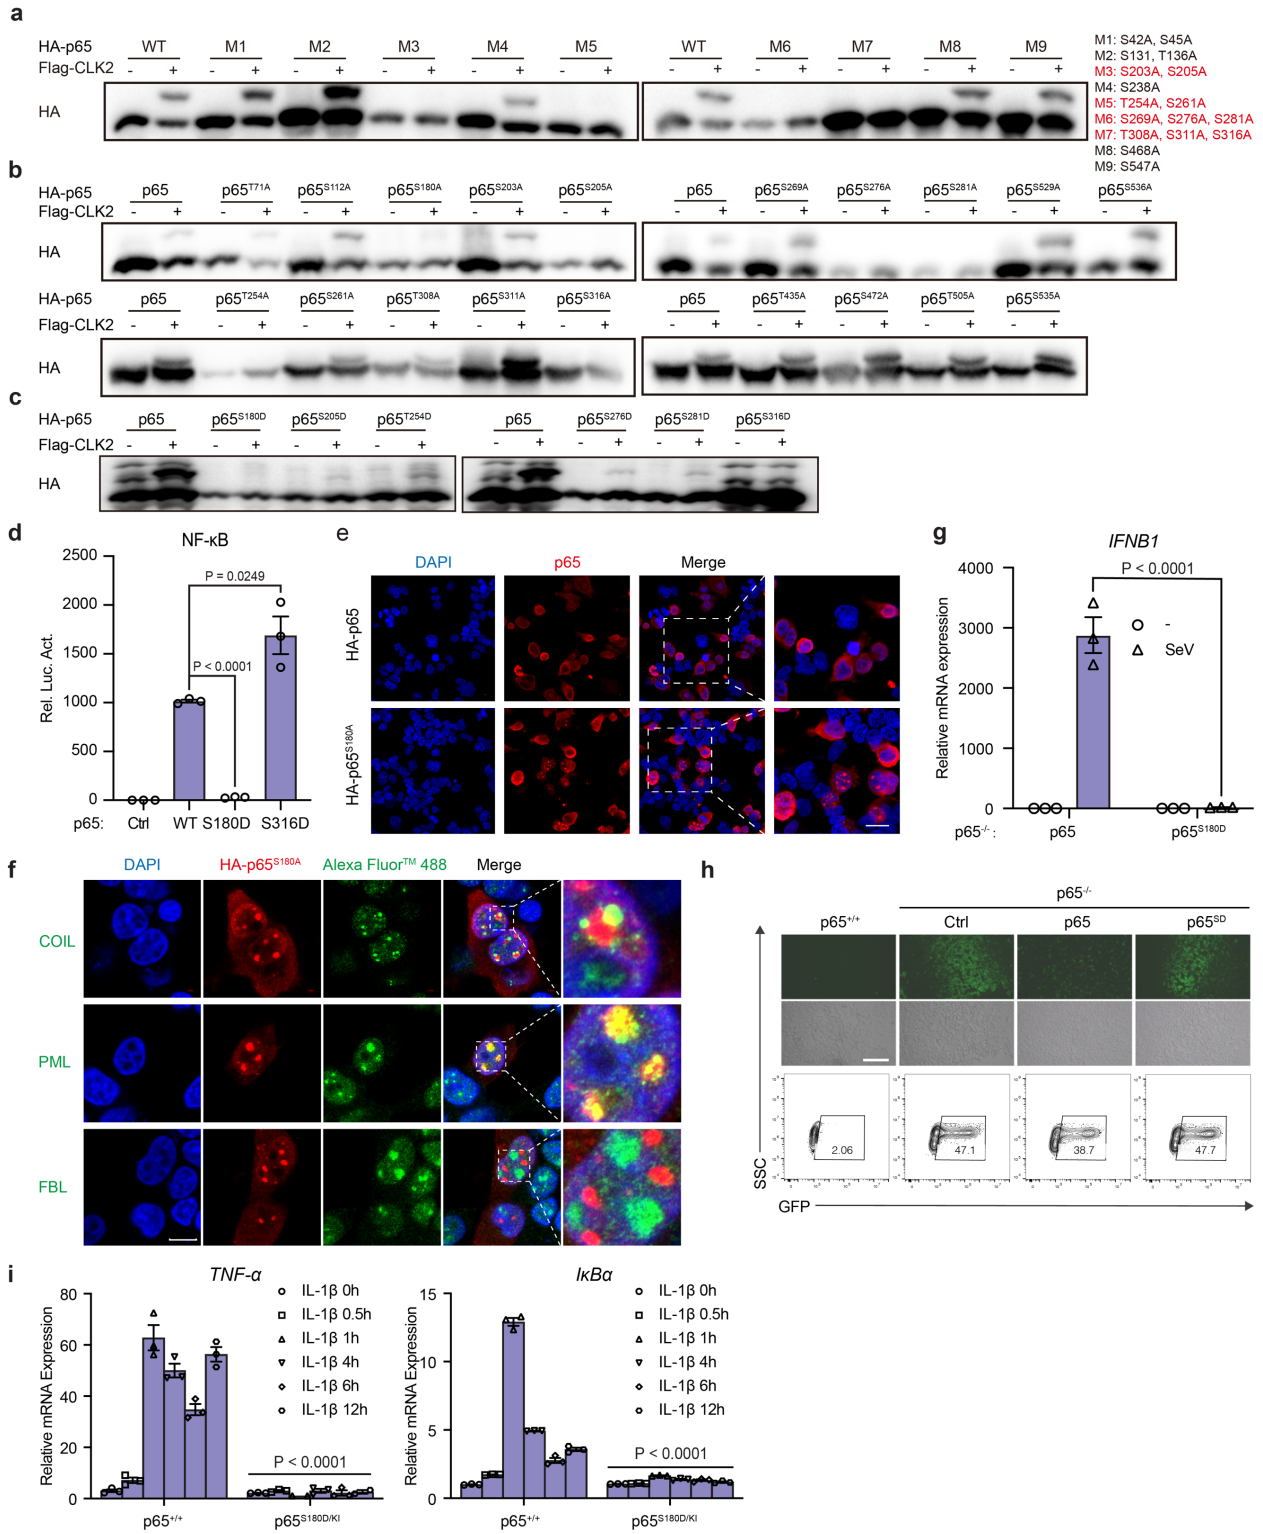



**Supplementary Figure 5. The phosphorylation of p65 at Ser180 by CLK2 inhibits the transcriptional ability of activated NF- $\kappa$ B.**

(a-c) Phos-tag SDS-PAGE analysis of the residues of p65 that are potentially phosphorylated by CLK2 using the indicated p65 mutants in HEK293T cells. The upper shifted band represents the phosphorylated p65 protein. (d) Luciferase reporter experiments analyzing NF- $\kappa$ B activity in HEK293T cells transfected with plasmids encoding p65, p65<sup>S180D</sup>, and p65<sup>S316D</sup> for 24 hours (n=3). (e) Immunofluorescence analysis of exogenous HA-p65<sup>S180A</sup> and wild-type p65 localization in HEK293T cells. The scale bar is 40  $\mu$ m. (f) The colocalization of HA-p65<sup>S180A</sup> with COIL, PML or FBL determined by immunofluorescence analysis in HEK293T cells. The scale bar is 40  $\mu$ m. (g) Real-time PCR analysis of SeV-induced *IFN $\beta$ 1* mRNA expression in the presence of p65 and p65<sup>S180D</sup> in p65<sup>-/-</sup> HEK293T cells (n=3). (h) The indicated cells were infected with VSV-GFP at an MOI of 0.01 for 12 hours before phase contrast and fluorescence microscopy and flow cytometric analysis. The scale bar is 250  $\mu$ m. (i) Real-time PCR analysis of *I $\kappa$ B $\alpha$*  and *TNF- $\alpha$*  mRNA levels in the indicated cells exposed to 20 ng/ml IL-1 $\beta$  for 0 h, 0.5, 1, 4, 6, and 12 hours (n=3). The data are representative of three independent experiments. The data are presented as the means  $\pm$  SEMs. Statistical significance was analyzed by two-tailed Student's *t* test (d, g) or two-tailed ANOVA (i) ( $p > 0.05$ , not significant, \* $p < 0.05$ , \*\* $p < 0.01$ , \*\*\* $p < 0.001$ , \*\*\*\* $p < 0.0001$ ). Source data (a-i) are provided as a Source Data file.

Supplementary Figure 6

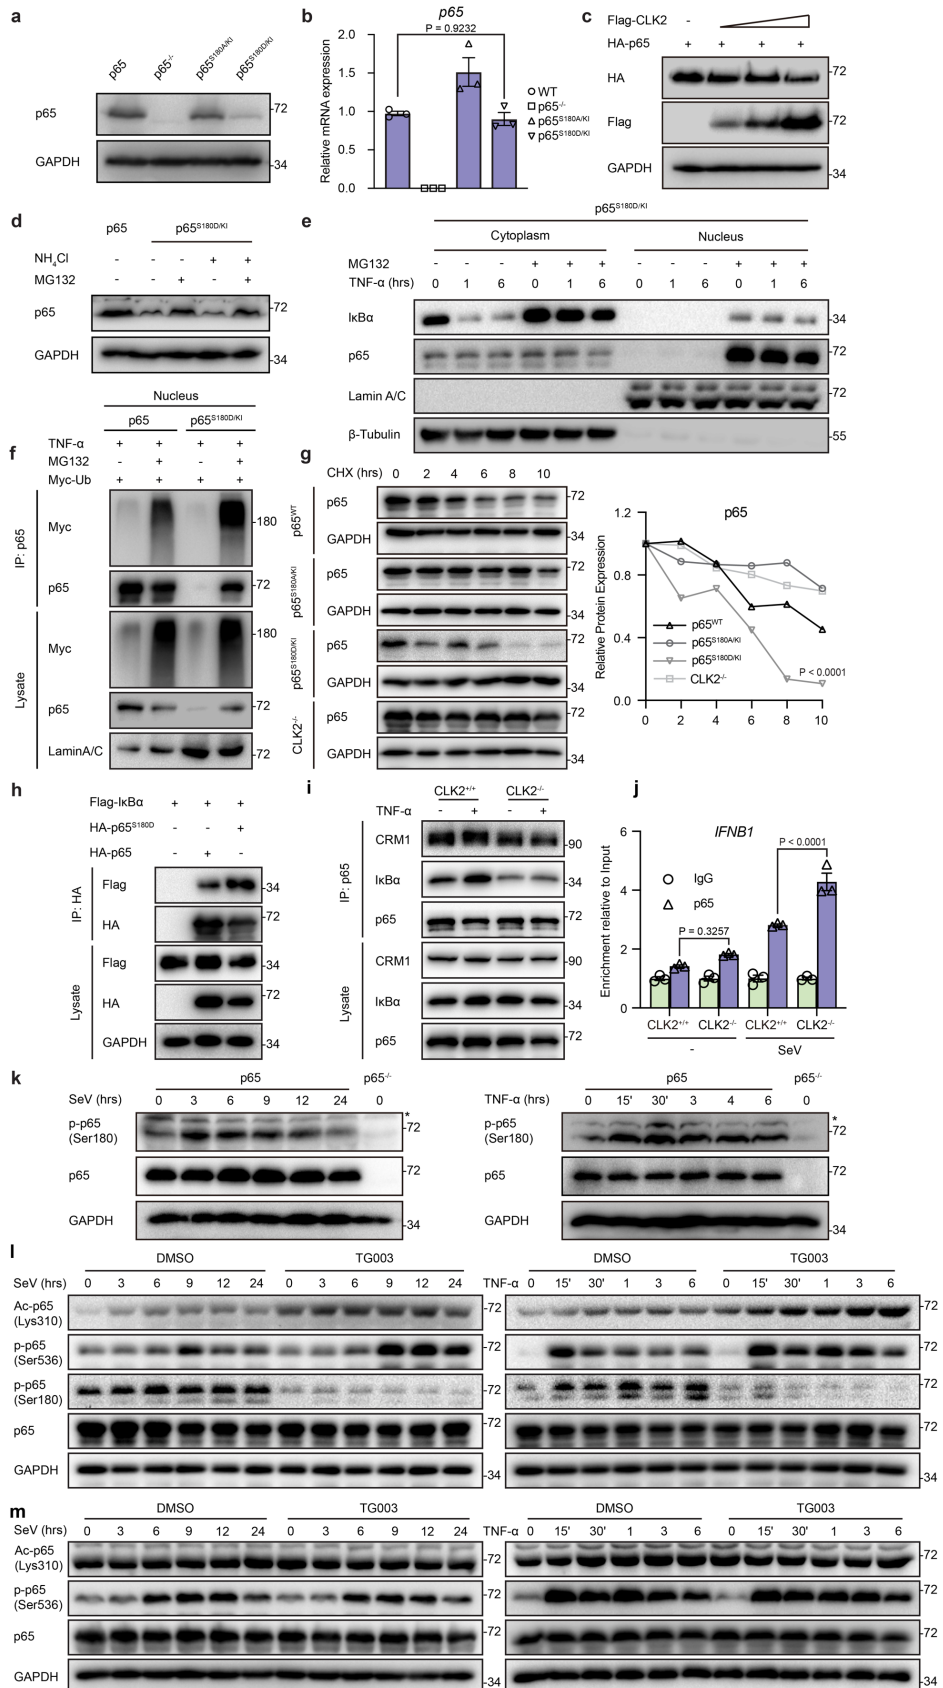

**Supplementary Figure 6. Ser180 phosphorylation of p65 results in its degradation and nuclear export.**

**(a-b)** Western blot and real-time PCR analysis of p65 protein and mRNA levels in p65<sup>+/+</sup>, p65<sup>-/-</sup>, p65<sup>S180A/KI</sup> and p65<sup>S180D/KI</sup> HEK293T cells. **(c)** Western blot analysis of p65 protein levels in the presence of increased CLK2 expression. **(d)** Western blot analysis of p65 protein levels in the presence of MG132 and NH<sub>4</sub>Cl in p65<sup>+/+</sup> and p65<sup>S180D/KI</sup> HEK293T cells. **(e)** Cytoplasmic and nuclear fractions of p65<sup>S180D/KI</sup> HEK293T cells stimulated with TNF- $\alpha$  at the indicated time points with or without MG132 before immunoblot analysis with anti-p65, anti-I $\kappa$ B $\alpha$ , anti-Tubulin and anti-LaminA/C antibodies. **(f)** The nuclear fractions of p65<sup>S180D/KI</sup> and p65<sup>+/+</sup> HEK293T cells in the presence of TNF- $\alpha$  with or without MG132, followed by coimmunoprecipitation of p65 and Myc-Ub, and the proteins were analyzed by Western blotting. **(g)** Time course of cycloheximide (CHX) treatment of p65<sup>+/+</sup>, p65<sup>S180A</sup>, p65<sup>S180D</sup> and CLK2<sup>-/-</sup> HEK293T cells, as determined by Western blot analysis with anti-p65 and anti-GAPDH antibodies. The samples were derived from the same experiment and that blots were processed in parallel. **(h)** The interaction between p65<sup>S180D</sup> and I $\kappa$ B $\alpha$  in HEK293T cells transfected with HA-p65, HA-p65<sup>S180D</sup> or Flag-I $\kappa$ B $\alpha$  was determined by coimmunoprecipitation with the indicated antibodies and immunoblot analyses. **(i)** Coimmunoprecipitation of endogenous p65 and I $\kappa$ B $\alpha$  or CRM1 was performed in CLK2<sup>+/+</sup> and CLK2<sup>-/-</sup> HEK293T cells in the presence or absence of TNF- $\alpha$  stimulation. **(j)** ChIP assays were performed in CLK2<sup>+/+</sup> and CLK2<sup>-/-</sup> HEK293T cells stimulated with SeV, and the promoter of IFNB1 was examined by real-time qPCR (n=3). The sequences are presented in Supplementary Table 2. **(k)** Western blot analysis of phosphorylated Ser180 p65 and total p65 and GAPDH in p65<sup>+/+</sup> and p65<sup>-/-</sup> HEK293T cells stimulated with SeV and TNF- $\alpha$  at the indicated times. The upper band marked with asterisk indicates the unspecific band. **(l)** Western blot analysis of phosphorylated Ser180 and Ser536 p65, acetylated Lys310 p65, total p65 and GAPDH in HEK293T cells treated with or without TG003 and exposed to SeV or TNF- $\alpha$  for the indicated times. **(m)** Western blot analysis of phosphorylated Ser536 p65, acetylated Lys310 p65, total p65 and GAPDH in HEK293T-CLK2<sup>-/-</sup> cells treated with or without TG003 and exposed to SeV or TNF- $\alpha$  for the indicated times. The data are representative of three independent experiments. The data are presented as the means  $\pm$  SEMs. Statistical significance was analyzed by two-tailed Student's *t* test (**b**) or two-tailed ANOVA (**g, j**) ( $p > 0.05$ , not significant, \* $p < 0.05$ , \*\* $p < 0.01$ , \*\*\* $p < 0.001$ , \*\*\*\* $p < 0.0001$ ). Source data (**a-l**) are provided as a Source Data file.

Supplementary Figure 7

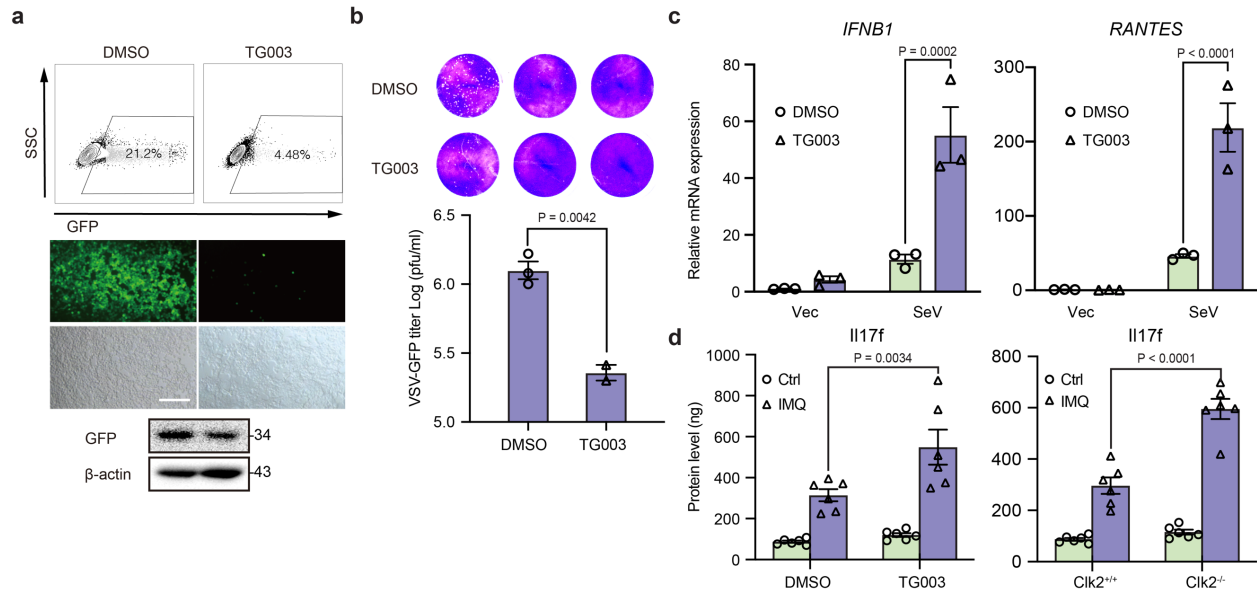

**Supplementary Figure 7. The CLK2 inhibitor TG003 exerts effects *in vitro* and *in vivo*.**

(a) HEK293T cells were infected with VSV-GFP at an MOI of 0.01 for 12 hours in the presence or absence of TG003 (20  $\mu$ M) before phase contrast and fluorescence microscopy and flow cytometric analysis. The scale bar is 250  $\mu$ m.

(b) HEK293T cells were infected with VSV-GFP in the presence or absence of TG003 (20  $\mu$ M) at an MOI of 0.01 for 1 hour in the presence or absence of TG003 (20  $\mu$ M) before the medium was replaced, and the cells were cultured for 24 hours. Then, the supernatants were diluted and added to Vero cells for plaque assays (n=3).

(c) Real-time PCR analysis of *IFNB1* and *RANTES* mRNA levels in the presence or absence of TG003 in HEK293T cells infected with SeV for 12 hours (n=3).

(d) ELISA analysis of the IL-17f protein level after treatment of Clk2-deficient mice with IMQ for 6 days or after intraperitoneal injection of TG003. The data are representative of three independent experiments. The data are presented as the means  $\pm$  SEMs. Statistical significance was analyzed by two-tailed Student's *t* test (b) or two-tailed ANOVA (c, d) ( $p > 0.05$ , not significant, \* $p < 0.05$ , \*\* $p < 0.01$ , \*\*\* $p < 0.001$ , \*\*\*\* $p < 0.0001$ ). Source data (a-d) are provided as a Source Data file.

## Supplementary Table 1

Supplementary Table 1. The Antibody and Reagents

| S.No. | Antibodies and Reagents                                        | Source                    | Antibody dilution                 | Identifier       |
|-------|----------------------------------------------------------------|---------------------------|-----------------------------------|------------------|
| 1     | Mouse anti-human CLK2, Polyclonal                              | Sigma                     | 1:1000 (WB)                       | Cat# HPA055366   |
| 2     | Mouse anti-human CLK2, Polyclonal                              | Abclonal Technology       | 1:1000 (WB)                       | Cat# A7885       |
| 3     | Rabbit anti-human IRF3, monoclonal                             | Cell Signaling Technology | 1:1000 (WB)                       | Cat# 11904S      |
| 4     | Rabbit anti-human p-IRF3 (Ser386), monoclonal                  | Cell Signaling Technology | 1:1000 (WB)                       | Cat# 37829S      |
| 5     | Mouse anti-human p65, monoclonal                               | Cell Signaling Technology | 1:1000 (WB) 1:200 (IF) 1:100 (IP) | Cat# 6956S       |
| 6     | Rabbit anti-human p-p65 (Ser536), monoclonal                   | Cell Signaling Technology | 1:1000 (WB)                       | Cat# 3033S       |
| 7     | Rabbit anti-human I $\kappa$ B $\alpha$ , monoclonal           | Cell Signaling Technology | 1:1000 (WB)                       | Cat# 4812        |
| 8     | Rabbit anti-human p-I $\kappa$ B $\alpha$ (Ser32), monoclonal  | Cell Signaling Technology | 1:1000 (WB)                       | Cat# 2859S       |
| 9     | Mouse anti-human $\beta$ -Tubulin, Polyclonal                  | Cell Signaling Technology | 1:1000 (WB)                       | Cat# 2146S       |
| 10    | Rabbit anti-human $\beta$ -actin, monoclonal                   | Abclonal Technology       | 1:50000 (WB)                      | Cat# AC026-200   |
| 11    | Mouse anti-human GAPDH, monoclonal                             | Abclonal Technology       | 1:50000 (WB)                      | Cat# AC033       |
| 12    | Mouse anti-human LaminA/C, monoclonal                          | Cell Signaling Technology | 1:1000 (WB)                       | Cat# 4777S       |
| 13    | Mouse anti-Flag, monoclonal                                    | MBL                       | 1:3000 (WB) 1:400 (IF) 1:150 (IP) | Cat# M185-3      |
| 14    | Mouse anti-Myc, monoclonal                                     | MBL                       | 1:3000 (WB) 1:400 (IF) 1:150 (IP) | Cat# M192-3      |
| 15    | Mouse anti-HA, monoclonal                                      | MBL                       | 1:3000 (WB) 1:400 (IF) 1:150 (IP) | Cat# M180-3      |
| 16    | Rabbit anti-Flag, Polyclonal                                   | MBL                       | 1:3000 (WB) 1:400 (IF) 1:150 (IP) | Cat# PM020       |
| 17    | Rabbit anti-Myc, Polyclonal                                    | MBL                       | 1:3000 (WB) 1:400 (IF) 1:150 (IP) | Cat# 562         |
| 18    | Rabbit anti-HA, Polyclonal                                     | MBL                       | 1:3000 (WB) 1:400 (IF) 1:150 (IP) | Cat# 561         |
| 19    | Rabbit IgG HRP Linked Antibody                                 | Jackson ImmunoResearch    | 1:10000                           | Cat# 111-035-003 |
| 20    | Mouse IgG HRP Linked Antibody                                  | Jackson ImmunoResearch    | 1:10000                           | Cat# 115-035-003 |
| 21    | Rabbit anti-human NF- $\kappa$ B1 p105/p50 (D4P4D), monoclonal | Cell Signaling Technology | 1:1000 (WB)                       | Cat# 13586       |
| 22    | Rabbit anti-human Exportin-1, monoclonal                       | Cell Signaling Technology | 1:1000 (WB)                       | Cat# 46249       |
| 23    | Rabbit anti-human PML, monoclonal                              | Cell Signaling Technology | 1:1000 (WB)                       | Cat# 33156       |
| 24    | Rabbit anti-human p-p65 (Ser468), Polyclonal                   | Cell Signaling Technology | 1:1000 (WB)                       | Cat# 3039        |
| 25    | Rabbit anti-human Acetyl-p65 (Lys310), monoclonal              | Cell Signaling Technology | 1:1000 (WB)                       | Cat# 12629       |
| 26    | Pacific Blue™ anti-mouse CD4, monoclonal                       | Biolegend                 | 1:200 (Flow)                      | Cat# 100427      |
| 27    | PE anti-mouse CD8b.2, monoclonal                               | Biolegend                 | 1:200 (Flow)                      | Cat# 140408      |
| 28    | FITC anti-mouse CD19, monoclonal                               | Biolegend                 | 1:200 (Flow)                      | Cat# 152403      |
| 29    | APC anti-mouse CD3, monoclonal                                 | Biolegend                 | 1:200 (Flow)                      | Cat# 100235      |
| 30    | PE anti-mouse CD25, monoclonal                                 | Biolegend                 | 1:200 (Flow)                      | Cat# 101903      |
| 31    | APC anti-mouse/human CD44, monoclonal                          | Biolegend                 | 1:200 (Flow)                      | Cat# 103011      |
| 32    | FITC anti-mouse CD62L, monoclonal                              | Biolegend                 | 1:200 (Flow)                      | Cat# 104405      |
| 33    | Human IFN $\beta$ 1 ELISA                                      | R&D                       | N/A                               | Cat# DY814-05    |
| 34    | Mouse Ifnb1 ELISA                                              | Biolegend                 | N/A                               | Cat# 439407      |
| 35    | Human RANTES ELISA                                             | Biolegend                 | N/A                               | Cat# 440807      |
| 36    | Mouse Rantes ELISA                                             | R&D                       | N/A                               | Cat# DY478       |
| 37    | Mouse Il-17f ELISA                                             | 4A BIOTECH                | N/A                               | Cat# CME0089-096 |
| 38    | TG003                                                          | MCE                       | N/A                               | Cat# HY-15338    |
| 39    | MG-132                                                         | Selleck                   | N/A                               | Cat# S2619       |
| 40    | Recombinant Human TNF alpha                                    | Novoprotein               | N/A                               | Cat# C008        |
| 41    | Recombinant Human IL-1 beta                                    | Novoprotein               | N/A                               | Cat# CG93        |
| 42    | LPS                                                            | Sigma                     | N/A                               | Cat# L2630       |
| 43    | Type II Collagenase                                            | Gibco                     | N/A                               | Cat# 17101015    |
| 44    | DNase I                                                        | ThermoFisher              | N/A                               | Cat# 18047019    |
| 45    | Phos-Tag™ Acrylamide                                           | Wako Chemicals            | N/A                               | Cat# 304-93521   |
| 46    | ADP-Glo™ Kinase Assay                                          | Promega                   | N/A                               | Cat# 6930        |
| 47    | CLK2 Kinase Enzyme System                                      | Promega                   | N/A                               | Cat# VA7414      |

Supplementary Table 2

Supplementary Table 2. The primer sequences and Oligo-DNA sequences

| Genes                          | Primers | Primer sequences                                                  | Application         |
|--------------------------------|---------|-------------------------------------------------------------------|---------------------|
| <i>hGAPDH</i>                  | Forward | 5-GAGTCAACGGATTTGGTCTG-3'                                         | RNA expression      |
|                                | Reverse | 5-GACAAGCTTCCCCTTCTCAG-3'                                         | RNA expression      |
| <i>mGAPDH</i>                  | Forward | 5-AGTGTTCCTCGTCCCCTAG-3'                                          | RNA expression      |
|                                | Reverse | 5-CCTTGACTGTGCCGTTGAAT-3'                                         | RNA expression      |
| <i>hIFNB1</i>                  | Forward | 5-TGACTATGGTCCAGGCACAG-3'                                         | RNA expression      |
|                                | Reverse | 5-TTGTGAGAACCTCTGGCT-3'                                           | RNA expression      |
| <i>hRANTES</i>                 | Forward | 5-GGCAGCCCTCGCTGTATCC-3'                                          | RNA expression      |
|                                | Reverse | 5-GCAGCAGGGTGTGGTGTCCG-3'                                         | RNA expression      |
| <i>mlfn1</i>                   | Forward | 5-CTGCCCTTTCATCCAGAG-3'                                           | RNA expression      |
|                                | Reverse | 5-TGTCTGCTGGTGGAGTTCAT-3'                                         | RNA expression      |
| <i>mRantes</i>                 | Forward | 5-ATATGGCTCGGACACCCTC-3'                                          | RNA expression      |
|                                | Reverse | 5-CACTTGCTGCTGGGTAGAA-3'                                          | RNA expression      |
| <i>hCLK2</i>                   | Forward | 5-GTCCGTTCTCGAAGCAGTTA-3'                                         | RNA expression      |
|                                | Reverse | 5-ACGTTGATCTCAAGTCGAGC-3'                                         | RNA expression      |
| <i>mClk2</i>                   | Forward | 5-AAGTAGCAGTGACCGACAA-3'                                          | RNA expression      |
|                                | Reverse | 5-GTCGTAGTAAGCCTCCCCTC-3'                                         | RNA expression      |
| <i>Clk2 WT</i>                 | Forward | 5-GCAAGTCGTTCCATCCAGCACTC-3'                                      | Mouse genome typing |
|                                | Reverse | 5-TGTGGTCCCACAAATGTCTCTC-3'                                       | Mouse genome typing |
| <i>Clk2 KO</i>                 | Forward | 5-TTCTAGGAAAGAACGAGTGGC-3'                                        | Mouse genome typing |
|                                | Reverse | 5-GGTGGTATCCGAGACAGGGTTT-3'                                       | Mouse genome typing |
| <i>sgCLK2</i>                  | Forward | 5-AGCGACGAAAGAAGTCGCTCC-3'                                        | Human gene deletion |
|                                | Reverse | 5-GGAGCGACTTCTTCGTCGCT-3'                                         | Human gene deletion |
| <i>sgClk2-1</i>                | Forward | 5-CAGCAATACGATGAGCCTCG-3'                                         | Mouse gene deletion |
|                                | Reverse | 5-CGAGGCTCATCGTATTGCTG-3'                                         | Mouse gene deletion |
| <i>sgClk2-2</i>                | Forward | 5-CTGCTTATCCTATCACTCTT-3'                                         | Mouse gene deletion |
|                                | Reverse | 5-AAGAGTGATAGGATAAGCAG-3'                                         | Mouse gene deletion |
| ISD45                          | Forward | 5-TACAGATCTACTAGTGATCTATGACTGATCTGTACATGATCTACA-3'                | DNA ligands         |
|                                | Reverse | 5-TGTAGATCATGTACAGATCAGTCATAGATCACTAGTAGATCTGTA-3'                | DNA ligands         |
| HSV60                          | Forward | 5-TAAGACACGATGCGATAAAATCTGTTGTAAAATTTATTAAGGGTACAAATTGCCCTAGC-3'  | DNA ligands         |
|                                | Reverse | 5-GCTAGGGCAATTTGTACCCTTAATAAATTTTACAAACAGATTTTATCGCATCGTGTCTTA-3' | DNA ligands         |
| DNA90                          | Forward | 5-TACAGATCTACTAGTGATCTATGACTGATCTGTACATGATCTACATACAGATCTACTAGTGA  | DNA ligands         |
|                                | Reverse | 5-TGTAGATCATGTACAGATCAGTCATAGATCACTAGTAGATCTGTATGTAGATCATGTACAG   | DNA ligands         |
| HSV120                         | Forward | 5-AGACGGTATATTTTTCGCTTATCACTGTCCCGATTGGACACGGTCTTGTGGGATAGGCA     | DNA ligands         |
|                                | Reverse | 5-AAGTCTCCAAAAACCCGCCACAAATAAAAAGGGGTTAACCCAAATATGCCTTCTGGGCAT    | DNA ligands         |
| <i>sgp65<sup>S180</sup></i>    | Forward | 5-CACCGTGTCAAAGATGGGATGAGAA'                                      | Human gene deletion |
|                                | Reverse | 5-AAACTTCTCATCCCCTCTTGACAC'                                       | Human gene deletion |
| Oligo-DNA-S180A                | Forward | 5-T*G*A*CAGTGC GG GACCCATCAGGCAGGCCCTCCGCTGCCGCTGTCTTGCGCATCCC    | Donor               |
|                                | Reverse | 5-T*G*A*CAGTGC GG GACCCATCAGGCAGGCCCTCCGCTGCCGCTGTCTTGACCATCCC    | Donor               |
| Oligo-DNA-S180D                | Forward | 5-T*G*A*CAGTGC GG GACCCATCAGGCAGGCCCTCCGCTGCCGCTGTCTTGCGCATCCC    | Donor               |
|                                | Reverse | 5-T*G*A*CAGTGC GG GACCCATCAGGCAGGCCCTCCGCTGCCGCTGTCTTGACCATCCC    | Donor               |
| p65 WT                         | Forward | 5-GCCTGCCGCTGTCTTTCT-3'                                           | Human genome typing |
| p65 180A                       | Forward | 5-GCCTGCCGCTGTCTTGCG-3'                                           | Human genome typing |
| p65 180D                       | Forward | 5-GCCTGCCGCTGTCTTGAC-3'                                           | Human genome typing |
| p65 WT                         | Reverse | 5-CTCTCTCCAGCCAACA-3'                                             | Human genome typing |
| p65 screening                  | Forward | 5-TATAGAAGAGCAGCGTGGGG-3'                                         | Human genome typing |
|                                | Reverse | 5-GCTGGGAGAGAGAGTAGA-3'                                           | Human genome typing |
| CLK2-Left arm                  | Forward | 5-CCGCTCGAGGATCTTGGTCTATCCCTT-3'                                  | Left arm            |
|                                | Reverse | 5-CCGGAATCCCGACTGATATCCCGACTGGA-3'                                | Left arm            |
| CLK2-Right arm                 | Forward | 5-CTAGTAGCTATAGCAGTGGGTGTCCAGT-3'                                 | Right arm           |
|                                | Reverse | 5-AAAAGCGGCCCTCTGAGCCATGTTTGCAACT-3'                              | Right arm           |
| sgCLK2 (for Flag-Tag Knock In) | Forward | 5-CACCGTTCGGTGACGATCAGGCCCT-3'                                    | Human gene deletion |
|                                | Reverse | 5-AAACAGGGCTGATCGTCAACCGACC-3'                                    | Human gene deletion |
| hIFNB1 (for ChIP-qPCR)         | Forward | 5-TGAAAGGGAGAAGTGAAAGT-3'                                         | ChIP-qPCR           |
|                                | Reverse | 5-AACACGAACAGTGTGCCTA-3'                                          | ChIP-qPCR           |
