# Supplementary material for: CLK2 mediates IκBα-independent early termination of NF-κB activation by inducing cytoplasmic redistribution and degradation
Source: PubMed Central journal article supplement (PMC11082251; doi:10.1038/s41467-024-48288-z), 2024-05-09
Supplement: 41467_2024_48288_MOESM3_ESM.pdf [file 41467_2024_48288_MOESM3_ESM.pdf]

## Reporting Summary

Nature Portfolio wishes to improve the reproducibility of the work that we publish. This form provides structure for consistency and transparency in reporting. For further information on Nature Portfolio policies, see our [Editorial Policies](#) and the [Editorial Policy Checklist](#).

### Statistics

For all statistical analyses, confirm that the following items are present in the figure legend, table legend, main text, or Methods section.

- | n/a                                 | Confirmed                                                                                                                                                                                                                                                                                      |
|-------------------------------------|------------------------------------------------------------------------------------------------------------------------------------------------------------------------------------------------------------------------------------------------------------------------------------------------|
| <input type="checkbox"/>            | <input checked="" type="checkbox"/> The exact sample size ( $n$ ) for each experimental group/condition, given as a discrete number and unit of measurement                                                                                                                                    |
| <input type="checkbox"/>            | <input checked="" type="checkbox"/> A statement on whether measurements were taken from distinct samples or whether the same sample was measured repeatedly                                                                                                                                    |
| <input type="checkbox"/>            | <input checked="" type="checkbox"/> The statistical test(s) used AND whether they are one- or two-sided<br><i>Only common tests should be described solely by name; describe more complex techniques in the Methods section.</i>                                                               |
| <input checked="" type="checkbox"/> | <input type="checkbox"/> A description of all covariates tested                                                                                                                                                                                                                                |
| <input type="checkbox"/>            | <input checked="" type="checkbox"/> A description of any assumptions or corrections, such as tests of normality and adjustment for multiple comparisons                                                                                                                                        |
| <input type="checkbox"/>            | <input checked="" type="checkbox"/> A full description of the statistical parameters including central tendency (e.g. means) or other basic estimates (e.g. regression coefficient) AND variation (e.g. standard deviation) or associated estimates of uncertainty (e.g. confidence intervals) |
| <input type="checkbox"/>            | <input checked="" type="checkbox"/> For null hypothesis testing, the test statistic (e.g. $F$ , $t$ , $r$ ) with confidence intervals, effect sizes, degrees of freedom and $P$ value noted<br><i>Give <math>P</math> values as exact values whenever suitable.</i>                            |
| <input checked="" type="checkbox"/> | <input type="checkbox"/> For Bayesian analysis, information on the choice of priors and Markov chain Monte Carlo settings                                                                                                                                                                      |
| <input checked="" type="checkbox"/> | <input type="checkbox"/> For hierarchical and complex designs, identification of the appropriate level for tests and full reporting of outcomes                                                                                                                                                |
| <input checked="" type="checkbox"/> | <input type="checkbox"/> Estimates of effect sizes (e.g. Cohen's $d$ , Pearson's $r$ ), indicating how they were calculated                                                                                                                                                                    |

*Our web collection on [statistics for biologists](#) contains articles on many of the points above.*

### Software and code

Policy information about [availability of computer code](#)

Data collection Promega GloMax 20/20 for Luciferase; Bio-Rad ChemiDoc XRS+ System for western blot; Monad Real-Time PCR System for real-time PCR; ZEISS LSM 980 for immunofluorescence; BECKMAN CytoFLEX for flow cytometry.

Data analysis GraphPad Prism 9.0.0 for graphs and statistical analysis; FlowJo X 10.0.7r2 for FACS plots; ImageJ for western blot.

For manuscripts utilizing custom algorithms or software that are central to the research but not yet described in published literature, software must be made available to editors and reviewers. We strongly encourage code deposition in a community repository (e.g. GitHub). See the Nature Portfolio [guidelines for submitting code & software](#) for further information.

### Data

Policy information about [availability of data](#)

All manuscripts must include a [data availability statement](#). This statement should provide the following information, where applicable:

- Accession codes, unique identifiers, or web links for publicly available datasets
- A description of any restrictions on data availability
- For clinical datasets or third party data, please ensure that the statement adheres to our [policy](#)

All data generated in this study are provided in the Source Data file. Source data are provided with this paper. The source data underlying Figs. 1a–h, 2b–e, 3a–b, 3d, 3f–g, 4a–g, 4i, 5a, 5d–e, 5g, 6c–g, 7b–c and 7f–j and Supplementary Figs. 1a, 1c–d, 2a–f, 3a–d, 3g–j, 3l, 4b–d, 5a–d, 5g, 5i, 6a–m, 7a–d. are available in the Source Data file whenever possible.

## Research involving human participants, their data, or biological material

Policy information about studies with [human participants or human data](#). See also policy information about [sex, gender \(identity/presentation\), and sexual orientation](#) and [race, ethnicity and racism](#).

|                                                                    |                                                                                                                                                                                                                                                                                                                                                                                                |
|--------------------------------------------------------------------|------------------------------------------------------------------------------------------------------------------------------------------------------------------------------------------------------------------------------------------------------------------------------------------------------------------------------------------------------------------------------------------------|
| Reporting on sex and gender                                        | For sex and gender reporting, we employed equal number of male and female mice for primary cells isolation to reflect the general phenomenon in mice cells. Because female mice have less body weight, and less virus required, we used female mice in virus-induced survival experiments. The remaining male mice were utilized for imiquimod-induced (IMQ) psoriasis-like skin inflammation. |
| Reporting on race, ethnicity, or other socially relevant groupings | N/A                                                                                                                                                                                                                                                                                                                                                                                            |
| Population characteristics                                         | N/A                                                                                                                                                                                                                                                                                                                                                                                            |
| Recruitment                                                        | N/A                                                                                                                                                                                                                                                                                                                                                                                            |
| Ethics oversight                                                   | All animal studies were conducted in accordance with the Guidelines of the China Animal Welfare Legislation and approved by the Committee on Ethics in the Care and Use of Laboratory Animals of Wuhan University (permit number: 15060A). All efforts were made to minimize suffering.                                                                                                        |

Note that full information on the approval of the study protocol must also be provided in the manuscript.

## Field-specific reporting

Please select the one below that is the best fit for your research. If you are not sure, read the appropriate sections before making your selection.

Life sciences  Behavioural & social sciences  Ecological, evolutionary & environmental sciences

For a reference copy of the document with all sections, see [nature.com/documents/nr-reporting-summary-flat.pdf](https://www.nature.com/documents/nr-reporting-summary-flat.pdf)

## Life sciences study design

All studies must disclose on these points even when the disclosure is negative.

|                 |                                                                                                                                                                                                                                                                                                                                                                                                                                                                                                                                                                        |
|-----------------|------------------------------------------------------------------------------------------------------------------------------------------------------------------------------------------------------------------------------------------------------------------------------------------------------------------------------------------------------------------------------------------------------------------------------------------------------------------------------------------------------------------------------------------------------------------------|
| Sample size     | No statistical method was used to predetermine the sample size. We used generally accepted sample size in accordance to our own previous publication (S.-Z.L. et al., 2019, Nature Communications) with reproducible differences between conditions indicating that the chosen sample size was sufficient. Our sample size is similar to those generally employed in the life sciences field<br>For cell and biochemical experiments, our data usually represent 3 independent biological replicates per condition. For animal experiments, we use 4–6 mice per group. |
| Data exclusions | No data was excluded from our study.                                                                                                                                                                                                                                                                                                                                                                                                                                                                                                                                   |
| Replication     | The experiments were performed with 2-3 independent replications and each replication is sufficient.                                                                                                                                                                                                                                                                                                                                                                                                                                                                   |
| Randomization   | For in vitro experiments, cells were randomly allocated into control and experimental groups. For in vivo experiments, age and sex-matched mice were randomized into all experimental groups.                                                                                                                                                                                                                                                                                                                                                                          |
| Blinding        | the researchers were not blinded during data collection and analysis. The experiments were investigated in specific cell types and with specific treatments and required precise control over the experimental conditions, aspects that are not conditions amenable to blinding. However, the experiments are repeated by independent researchers to validate the results.                                                                                                                                                                                             |

## Reporting for specific materials, systems and methods

We require information from authors about some types of materials, experimental systems and methods used in many studies. Here, indicate whether each material, system or method listed is relevant to your study. If you are not sure if a list item applies to your research, read the appropriate section before selecting a response.

## Materials &amp; experimental systems

| n/a                                 | Involved in the study                                           |
|-------------------------------------|-----------------------------------------------------------------|
| <input type="checkbox"/>            | <input checked="" type="checkbox"/> Antibodies                  |
| <input type="checkbox"/>            | <input checked="" type="checkbox"/> Eukaryotic cell lines       |
| <input checked="" type="checkbox"/> | <input type="checkbox"/> Palaeontology and archaeology          |
| <input type="checkbox"/>            | <input checked="" type="checkbox"/> Animals and other organisms |
| <input checked="" type="checkbox"/> | <input type="checkbox"/> Clinical data                          |
| <input checked="" type="checkbox"/> | <input type="checkbox"/> Dual use research of concern           |
| <input checked="" type="checkbox"/> | <input type="checkbox"/> Plants                                 |

## Methods

| n/a                                 | Involved in the study                              |
|-------------------------------------|----------------------------------------------------|
| <input checked="" type="checkbox"/> | <input type="checkbox"/> ChIP-seq                  |
| <input type="checkbox"/>            | <input checked="" type="checkbox"/> Flow cytometry |
| <input checked="" type="checkbox"/> | <input type="checkbox"/> MRI-based neuroimaging    |

## Antibodies

## Antibodies used

CLK2 (HPA055366) (Sigma, Darmstadt, Germany); CLK2 (A7885), beta-actin (AC026-200), GAPDH (AC033) (Abclonal Technology, Wuhan, China); IRF3 (11904S), p-IRF3 (Ser386) (37829S), p65 (6956S), p-p65 (Ser536) (3033S), IκBα (4812), p-IκBα (2859S), beta-Tubulin (2146S), LaminA/C (4777S), NF-κB1 p105/p50 (13586), CRM1 (46249), PML (33156), p-p65 (Ser468) (3039), Acetyl-p65 (Lys310) (12629) (Cell Signaling, Danvers, MA, USA); Flag (M185-3) (PM020), Myc (M192-3) (562), HA (M180-3) (561) (MBL, Chiba, Japan); p-p65 (Ser180) was purchased from Abclonal Technology; Rabbit IgG HRP Linked Antibody (111-035-003), Mouse IgG HRP Linked Antibody (115-035-003) (Jackson ImmunoResearch, Pennsylvania, USA); Pacific Blue™ anti-mouse CD4 (100427), PE anti-mouse CD8b.2 (140408), FITC anti-mouse CD19 (152403), APC anti-mouse CD3 (100235), PE anti-mouse CD25 (101903), APC anti-mouse/human CD44 (103011), FITC anti-mouse CD62L (104405) (Biolegend, California, USA).

## Validation

p-p65 (Ser180) antibody was validated by p65 deficient cell lines in Supplementary Fig. 6k. CLK2 (A7885) (Abclonal Technology, Wuhan, China) was validated in CLK2 deficient cell lines in Supplementary Fig. 3g. All the other antibodies were tested by the manufacturers as below.

CLK2 (HPA055366) (Sigma, Darmstadt, Germany) <https://www.sigmaaldrich.cn/CN/zh/product/sigma/hpa055366>

beta-actin (AC026-200) (Abclonal Technology, Wuhan, China) <https://abclonal.com.cn/catalog/AC026>

GAPDH (AC033) (Abclonal Technology, Wuhan, China) <https://abclonal.com.cn/catalog/AC033>

IRF3 (11904S) (Cell Signaling, Danvers, MA, USA) <https://www.cellsignal.cn/products/primary-antibodies/irf-3-d6i4c-xp-174-rabbit-mab/11904>

p-IRF3 (Ser386) (37829S) (Cell Signaling, Danvers, MA, USA) <https://www.cellsignal.cn/products/primary-antibodies/phospho-irf-3-ser386-e7j8g-xp-174-rabbit-mab/37829>

p65 (6956S) (Cell Signaling, Danvers, MA, USA) <https://www.cellsignal.cn/products/primary-antibodies/nf-kb-p65-l8f6-mouse-mab/6956>

p-p65 (Ser536) (3033S) (Cell Signaling, Danvers, MA, USA) <https://www.cellsignal.cn/products/primary-antibodies/phospho-nf-kb-p65-ser536-93h1-rabbit-mab/3033>

IκBα (4812) (Cell Signaling, Danvers, MA, USA) <https://www.cellsignal.cn/products/primary-antibodies/ikba-44d4-rabbit-mab/4812>

p-IκBα (2859S) (Cell Signaling, Danvers, MA, USA) <https://www.cellsignal.cn/products/primary-antibodies/phospho-ikba-ser32-14d4-rabbit-mab/2859>

beta-Tubulin (2146S) (Cell Signaling, Danvers, MA, USA) <https://www.cellsignal.cn/products/primary-antibodies/b-tubulin-antibody/2146>

LaminA/C (4777S) (Cell Signaling, Danvers, MA, USA) <https://www.cellsignal.cn/products/primary-antibodies/lamin-a-c-4c11-mouse-mab/4777>

NF-κB1 p105/p50 (13586) (Cell Signaling, Danvers, MA, USA) <https://www.cellsignal.cn/products/primary-antibodies/nf-kb1-p105-p50-d4p4d-rabbit-mab/13586>

CRM1 (46249) (Cell Signaling, Danvers, MA, USA) <https://www.cellsignal.cn/products/primary-antibodies/exportin-1-crm1-d6v7n-rabbit-mab/46249>

PML (33156) (Cell Signaling, Danvers, MA, USA) <https://www.cellsignal.cn/products/primary-antibodies/pml-e5r8t-rabbit-mab/33156>

p-p65 (Ser468) (3039) (Cell Signaling, Danvers, MA, USA) <https://www.cellsignal.cn/products/primary-antibodies/phospho-nf-kb-p65-ser468-antibody/3039>

Acetyl-p65 (Lys310) (12629) (Cell Signaling, Danvers, MA, USA) <https://www.cellsignal.cn/products/primary-antibodies/acetyl-nf-kb-p65-lys310-d2s3j-rabbit-mab/12629>

Flag (M185-3) (MBL, Chiba, Japan) <https://www.mblbio.com/bio/g/dtl/A/index.html?pcd=M185-3L>

Flag (PM020) (MBL, Chiba, Japan) <https://www.mblbio.com/bio/g/dtl/A/?pcd=PM020>

Myc (M192-3) (MBL, Chiba, Japan) <https://www.mblbio.com/bio/g/dtl/A/?pcd=M192-3>

Myc (562) (MBL, Chiba, Japan) <https://www.mblbio.com/bio/g/dtl/A/?pcd=562>

HA (M180-3) (MBL, Chiba, Japan) <https://www.mblbio.com/bio/g/dtl/A/?pcd=M180-3>

HA (561) (MBL, Chiba, Japan) <https://www.mblbio.com/bio/g/dtl/A/?pcd=561>

Rabbit IgG HRP Linked Antibody (111-035-003) (Jackson ImmunoResearch, Pennsylvania, USA) <https://www.jacksonimmuno.com/catalog/products/111-035-003>

Mouse IgG HRP Linked Antibody (115-035-003) (Jackson ImmunoResearch, Pennsylvania, USA) <https://www.jacksonimmuno.com/catalog/products/115-035-003>

Pacific Blue™ anti-mouse CD4 (100427) (Biolegend, California, USA) <https://www.biolegend.com/en-gb/products/pacific-blue-anti-mouse-cd4-antibody-3316>

PE anti-mouse CD8b.2 (140408) (Biolegend, California, USA) <https://www.biolegend.com/en-gb/products/pe-anti-mouse-cd8b-2-antibody-6871>

FITC anti-mouse CD19 (152403) (Biolegend, California, USA) <https://www.biolegend.com/en-gb/products/fitc-anti-mouse-cd19-antibody-13615>

APC anti-mouse CD3 (100235) (Biolegend, California, USA) <https://www.biolegend.com/en-gb/products/apc-anti-mouse-cd3-antibody-8055>

PE anti-mouse CD25 (101903) (Biolegend, California, USA) <https://www.biolegend.com/en-gb/products/pe-anti-mouse-cd25->

antibody-129  
 APC anti-mouse/human CD44 (103011) (Biolegend, California, USA) <https://www.biolegend.com/en-gb/products/apc-anti-mouse-human-cd44-antibody-312>  
 FITC anti-mouse CD62L (104405) (Biolegend, California, USA) <https://www.biolegend.com/en-gb/products/fitc-anti-mouse-cd62l-antibody-384>

## Eukaryotic cell lines

Policy information about [cell lines and Sex and Gender in Research](#)

|                                                                   |                                                                                                                                                                                                                                                                                                                                                                                                                                                                                                                            |
|-------------------------------------------------------------------|----------------------------------------------------------------------------------------------------------------------------------------------------------------------------------------------------------------------------------------------------------------------------------------------------------------------------------------------------------------------------------------------------------------------------------------------------------------------------------------------------------------------------|
| Cell line source(s)                                               | HEK293T, HeLa, THP-1 and Vero cell lines were come from ATCC (Zhenghe Wang and Hongbing Shu' lab previously used); The p65 <sup>-/-</sup> HEK293T cell line was a gift from Bo Zhong (Wuhan University, Hubei, China); CLK2 <sup>-/-</sup> HEK293T cells and p65S180A/D knock-in cell lines were generated in our lab; BMDMs and BMDCs were isolated from 6-week-old C57BL/6J Clk2 knockout mice (two male mice and two female mice); MLFs, Lungs were isolated from 10-week-old mice (two male mice and two female mice). |
| Authentication                                                    | Common used HEK293T, HeLa, THP-1 and Vero cell lines which were previously used in Zhenghe Wang and Hongbing Shu' lab were identified by company. Murine cell lines were derived by ourself and authenticated by morphology.                                                                                                                                                                                                                                                                                               |
| Mycoplasma contamination                                          | Mycoplasma contamination was detected for common used cell lines, 293T and THP1. And there is no contamination of Mycoplasma                                                                                                                                                                                                                                                                                                                                                                                               |
| Commonly misidentified lines (See <a href="#">ICLAC</a> register) | There is no commonly misidentified cell lines were used in the study.                                                                                                                                                                                                                                                                                                                                                                                                                                                      |

## Animals and other research organisms

Policy information about [studies involving animals; ARRIVE guidelines](#) recommended for reporting animal research, and [Sex and Gender in Research](#)

|                         |                                                                                                                                                                                                                                                                                         |
|-------------------------|-----------------------------------------------------------------------------------------------------------------------------------------------------------------------------------------------------------------------------------------------------------------------------------------|
| Laboratory animals      | The male or female C57BL/6 mice at 6-10 weeks were used for the experiments and housed under a 12:12-hour light/dark cycle at a controlled temperature.                                                                                                                                 |
| Wild animals            | There is no wild animals were used in the study.                                                                                                                                                                                                                                        |
| Reporting on sex        | There was no sex bias in the animals used in this study.                                                                                                                                                                                                                                |
| Field-collected samples | There is no field collected samples were used in the study.                                                                                                                                                                                                                             |
| Ethics oversight        | All animal studies were conducted in accordance with the Guidelines of the China Animal Welfare Legislation and approved by the Committee on Ethics in the Care and Use of Laboratory Animals of Wuhan University (permit number: 15060A). All efforts were made to minimize suffering. |

Note that full information on the approval of the study protocol must also be provided in the manuscript.

## Plants

|                       |     |
|-----------------------|-----|
| Seed stocks           | N/A |
| Novel plant genotypes | N/A |
| Authentication        | N/A |

## Plots

Confirm that:

- The axis labels state the marker and fluorochrome used (e.g. CD4-FITC).
- The axis scales are clearly visible. Include numbers along axes only for bottom left plot of group (a 'group' is an analysis of identical markers).
- All plots are contour plots with outliers or pseudocolor plots.
- A numerical value for number of cells or percentage (with statistics) is provided.

## Methodology

Sample preparation

After 16 hours of GFP-VSV infection, the indicated cells were harvested and resuspended in 0.5 mL phosphate-buffered saline (PBS); Single cell suspensions were incubated with fluorochrome-conjugated antibodies against surface markers in PBS containing 1.5% FBS for 20 min at 4 C and then washed. Cells were then fixed for 30 min at 4 C using Biolegend Cytofix/Cytoperm and washed twice followed by flow cytometry analysis.

Instrument

The samples were analyzed by flow cytometry (Cytoflex, Beckman Coulter, Fullerton, CA, USA)

Software

The flow cytometry data were collected by cytoexpert (Beckman Coulter, Fullerton, CA, USA) and analyzed using FlowJo software (TreeStar, Ashland, OR, USA)

Cell population abundance

around 10000-20000 cells were collected

Gating strategy

For GFP-VSV infection, According to the intensity of GFP; Forward versus side scatter (FSC vs SSC) gating was used to identify cells of interest and exclude debris and dead cells. Also, A forward scatter height (FSC-W/A) vs. forward scatter area (FSC-H) density plot was used to exclude doublets.

- Tick this box to confirm that a figure exemplifying the gating strategy is provided in the Supplementary Information.
